# Supplementary material
Source: PubMed Central journal article supplement (PMC3264734)
Supplement: NIHMS343033-supplement-1_si_001.pdf [file NIHMS343033-supplement-1_si_001.pdf]

# MALDI Mass Spectrometric Imaging of Cardiac Tissue Following Myocardial Infarction in a Rat Coronary Artery Ligation Model

Prepared for Resubmission to *Analytical Chemistry* (12/11/1 Revision)

Robert F. Menger;<sup>†</sup> Whitney L. Stutts;<sup>†</sup> Dhanam S. Anbukumar;<sup>‡</sup> John A. Bowden;<sup>‡</sup>  
David A. Ford;<sup>‡</sup> Richard A. Yost<sup>†</sup>

Department of Chemistry, University of Florida, Gainesville, FL;<sup>†</sup> Department of Biochemistry and Molecular Biology, and Center for Cardiovascular Research, Saint Louis University, St. Louis, MO<sup>‡</sup>

- Author to whom correspondence should be sent – [ryost@ufl.edu](mailto:ryost@ufl.edu) (352) 392-0557  
Department of Chemistry, University of Florida, Gainesville, FL 32611-7200

## List of Figures

**Figure S-1.** MS image of  $m/z$  132 normalized to the TIC from control cardiac tissue.

**Figure S-2.** MS spectra of 100 ppm LPC 17:0 synthetic standard spotted with 40 mg/mL DHB in 70:30 MeOH:H<sub>2</sub>O (v/v) with 10 mM NaOAc (**a**) or 10 mM KOAc (**b**).

**Figure S-3.** MS<sup>2</sup> spectra of the [M+H]<sup>+</sup> at  $m/z$  510 (**a**) and the [M+Na]<sup>+</sup> at  $m/z$  532 (**b**) and MS<sup>3</sup> spectrum of  $m/z$  532 → 473 (**c**). All spectra were acquired from a 100 ppm standard of LPC 17:0 spotted with 40 mg/mL DHB in 70:30 MeOH:H<sub>2</sub>O (v/v) with 10 mM NaOAc.

**Figure S-4.** MS<sup>2</sup> spectra of the [M+K]<sup>+</sup> at *m/z* 548 **(a)** and MS<sup>3</sup> spectrum of *m/z* 548 → 489 **(b)**. All spectra were acquired from a 100 ppm standard of LPC 17:0 spotted with 40 mg/mL DHB in 70:30 MeOH:H<sub>2</sub>O (v/v) with 10 mM KOAc.

**Figure S-5.** MS<sup>2</sup> spectrum using CID of *m/z* 546 **(a)** and MS<sup>3</sup> spectrum using CID of *m/z* 546 → 487 **(b)** from infarcted cardiac tissue. The structure of LPC 18:0 and an MS<sup>2</sup> image of *m/z* 546→487 from cardiac tissue following LAD coronary artery ligation is shown as an inset in **(a)**.

**Figure S-6.** MS<sup>2</sup> spectrum of *m/z* 848 using PQD from infarcted cardiac tissue. The structure of PC (18:0/20:4) and an MS<sup>2</sup> image of *m/z* 848 → 789 from cardiac tissue following LAD ligation are shown as an inset.

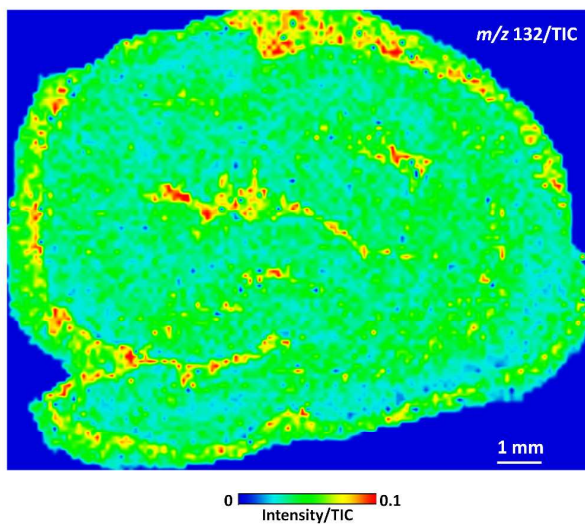

**Figure S-1.** MS image of  $m/z$  132 intensity divided by the TIC from control cardiac tissue.

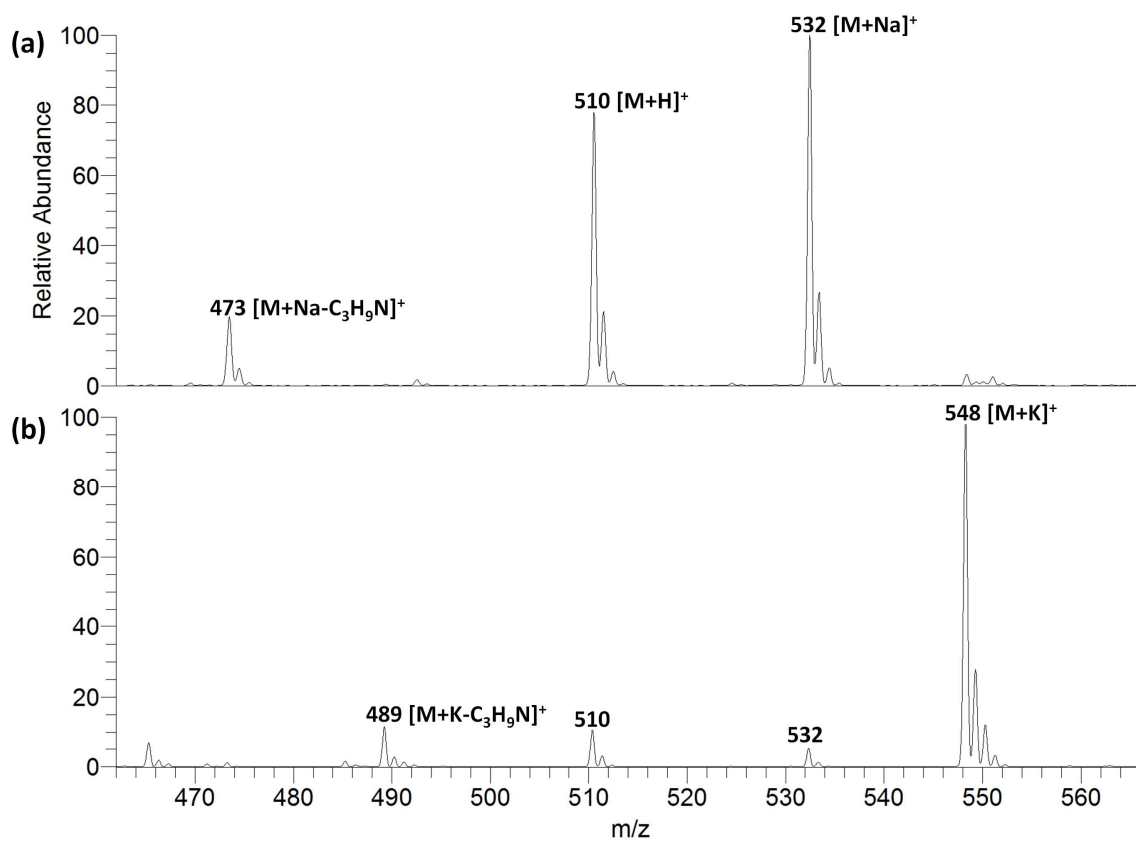

**Figure S-2.** MS spectra of 100 ppm LPC 17:0 synthetic standard spotted with 40 mg/mL DHB in 70:30 MeOH:H<sub>2</sub>O (v/v) with 10 mM NaOAc **(a)** or 10 mM KOAc **(b)**.

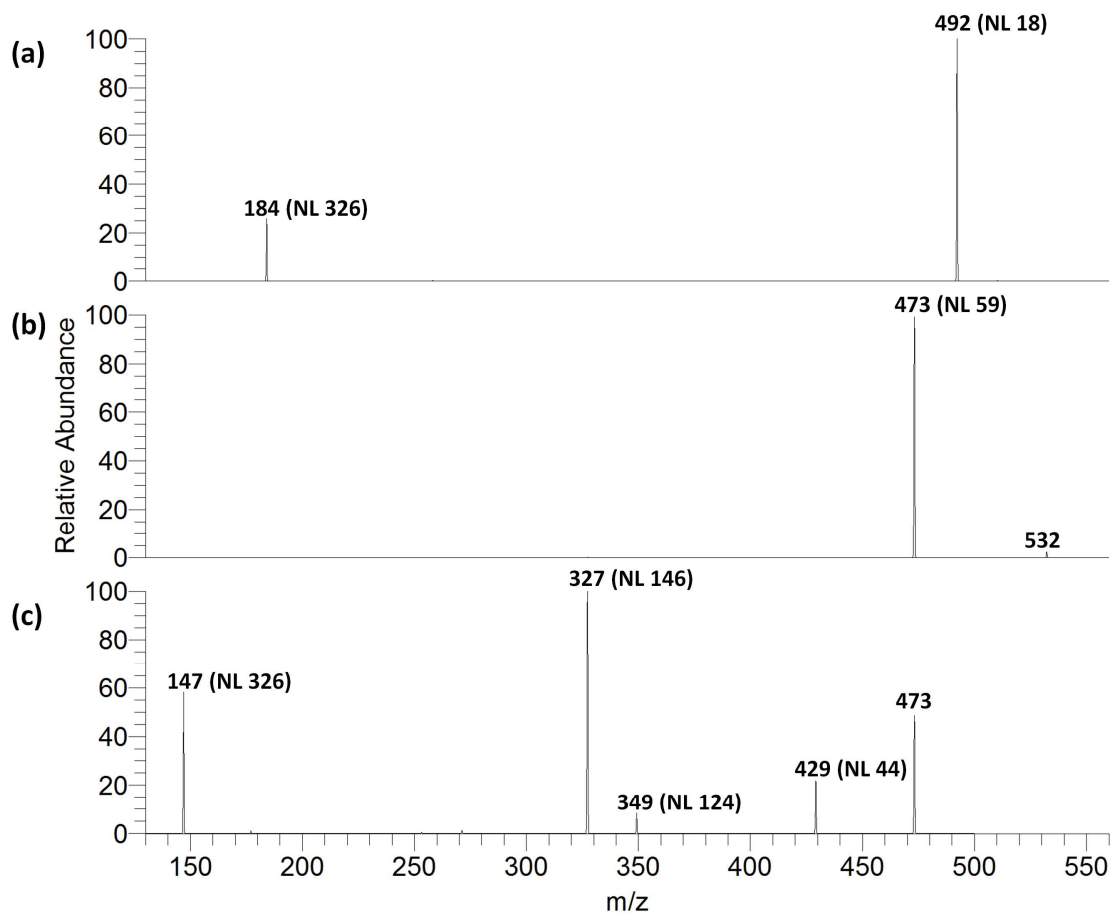

**Figure S-3.** MS<sup>2</sup> spectra of the [M+H]<sup>+</sup> at *m/z* 510 (a) and the [M+Na]<sup>+</sup> at *m/z* 532 (b) and MS<sup>3</sup> spectrum of *m/z* 532→473 (c). All spectra were acquired from a 100 ppm standard of LPC 17:0 spotted with 40 mg/mL DHB in 70:30 MeOH:H<sub>2</sub>O (v/v) with 10 mM NaOAc.

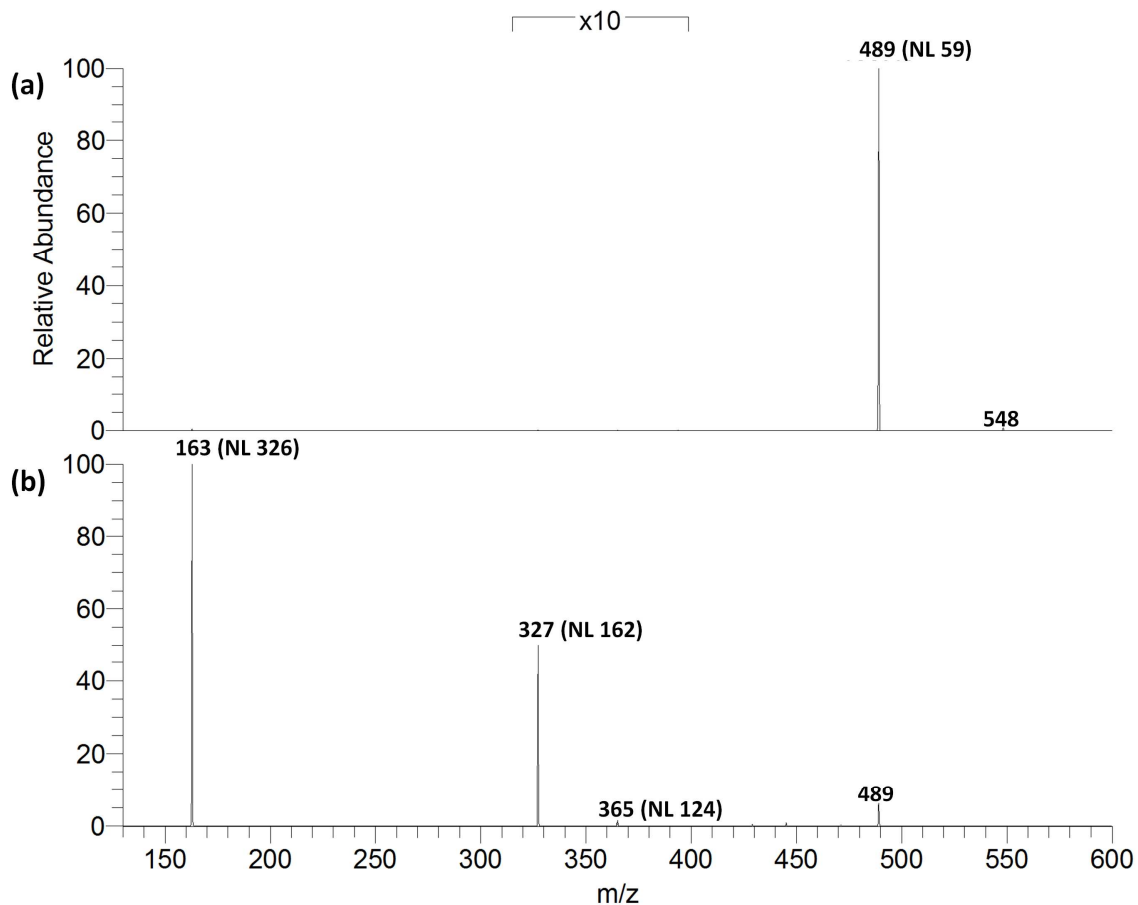

**Figure S-4.** MS<sup>2</sup> spectra of the [M+K]<sup>+</sup> at *m/z* 548 (a) and MS<sup>3</sup> spectrum of *m/z* 548 → 489 (b). All spectra were acquired from a 100 ppm standard of LPC 17:0 spotted with 40 mg/mL DHB in 70:30 MeOH:H<sub>2</sub>O (v/v) with 10 mM KOAc.

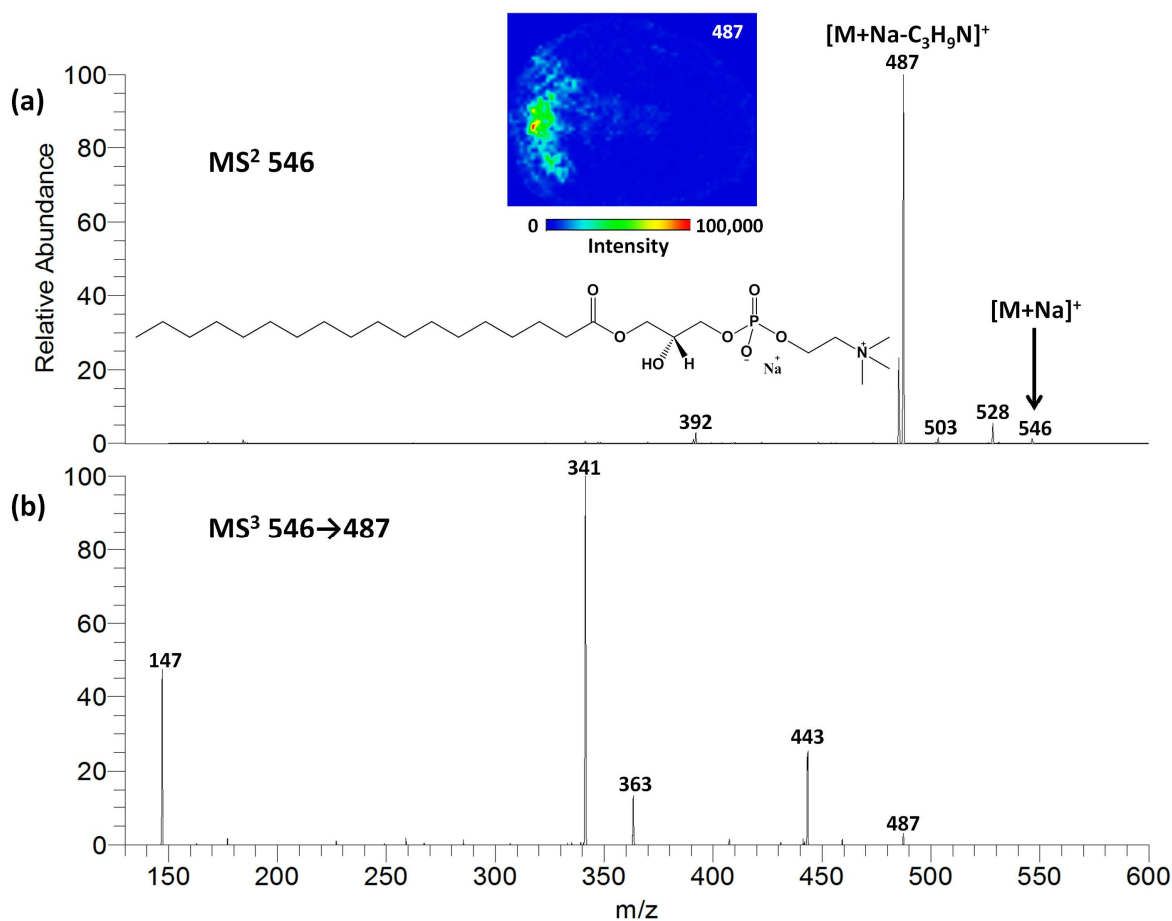

**Figure S-5.** MS<sup>2</sup> spectrum using CID of  $m/z$  546 **(a)** and MS<sup>3</sup> spectrum using CID of  $m/z$  546  $\rightarrow$  487 **(b)** from infarcted cardiac tissue. The major fragment in **(a)** is a NL of 59, indicating an alkali metal adduct of a PC. Furthermore, in **(b)**, the 22 Da difference between  $m/z$  363 and 341 indicate a sodiated PC. Also, the fragment ion at  $m/z$  147 is indicative of sodiated cyclophosphane, a characteristic ion of sodiated PCs. The ion was identified as the [M+Na]<sup>+</sup> of LPC 18:0. The structure and an MS<sup>2</sup> image of  $m/z$  546 $\rightarrow$ 487 from cardiac tissue following LAD coronary artery ligation is shown as an inset in **(a)**.

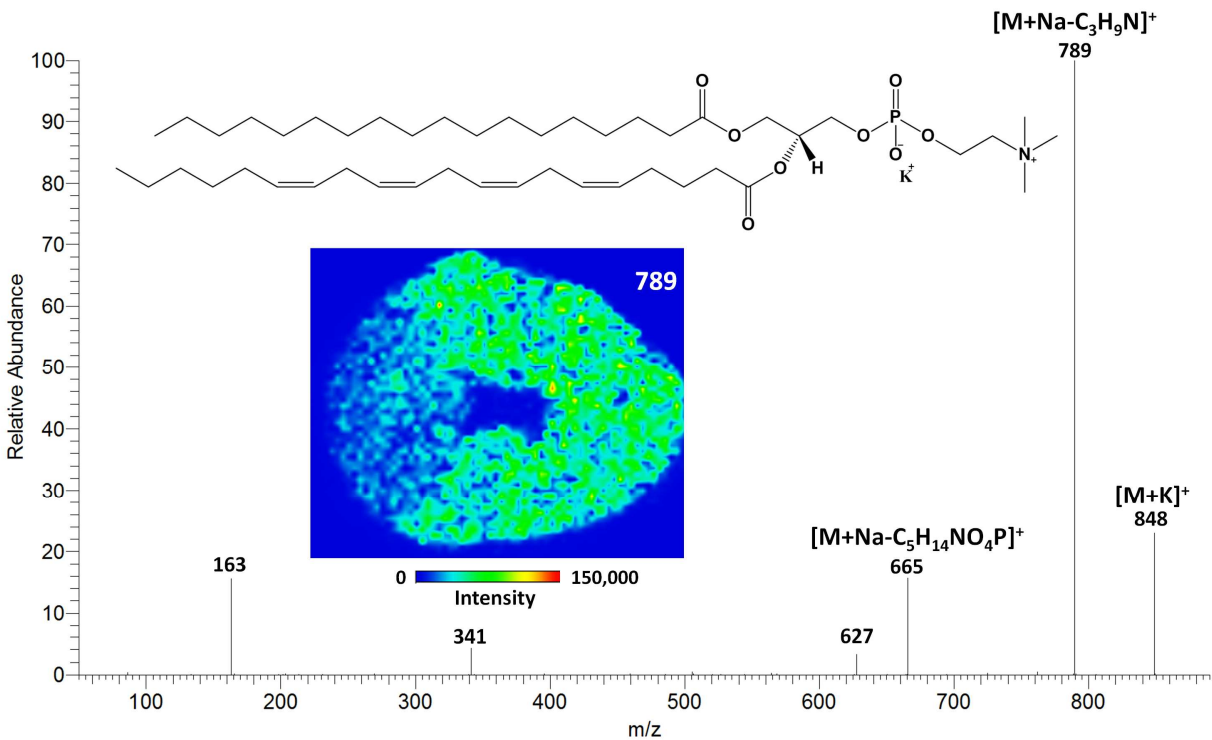

**Figure S-6.** MS<sup>2</sup> spectrum of  $m/z$  848 using PQD from infarcted cardiac tissue. A NL of 59 indicates an alkali metal adduct of a PC. The 38 Da difference between  $m/z$  655 and 627 and the fragment ion at  $m/z$  163 (potassiated cyclophosphane) indicate a potassiated PC. MS<sup>3</sup> demonstrated a minor NL of 284, indicating a stearic fatty acid tail in the *sn*-1 position of the glycerol backbone (data not shown). Therefore, the ion was identified as the [M+K]<sup>+</sup> of PC (18:0/20:4). The structure and an MS<sup>2</sup> image of  $m/z$  848→789 from cardiac tissue following LAD ligation are shown as an inset. Unlike CID, PQD is not hindered by a LMCO, providing the potential for a larger number of characteristic ions within one MS<sup>2</sup> experiment. For example, when isolating the ion at  $m/z$  848, the typical LMCO for CID on a linear ion trap is  $m/z$  230, excluding the characteristic potassiated cyclophosphane ion ( $m/z$  163).
